# Supplementary material for: Mental Health Literacy and Positive Mental Health in Adolescents: A Correlational Study
Source: Int J Environ Res Public Health. 2022 Jul 3;19(13):8165. doi: 10.3390/ijerph19138165 (PMC9266633; doi:10.3390/ijerph19138165)
Supplement: Supplementary file 1 [file ijerph-19-08165-s001.zip › Table S1.pdf]

**Table S1.** Sample Characteristics (*n* = 260).

|                                                                   | <i>n</i> | %    | Min. | Max. | Mean (SD)    |
|-------------------------------------------------------------------|----------|------|------|------|--------------|
| Age                                                               |          |      | 10   | 19   | 14.07 (1.96) |
| Sex                                                               |          |      |      |      |              |
| Female                                                            | 145      | 55.8 |      |      |              |
| Male                                                              | 115      | 44.2 |      |      |              |
| Year of School                                                    |          |      |      |      |              |
| 5th                                                               | 28       | 10.8 |      |      |              |
| 6th                                                               | 7        | 2.7  |      |      |              |
| 7th                                                               | 42       | 16.2 |      |      |              |
| 8th                                                               | 50       | 19.2 |      |      |              |
| 9th                                                               | 62       | 24.2 |      |      |              |
| 10th                                                              | 27       | 10.4 |      |      |              |
| 11th                                                              | 28       | 10.8 |      |      |              |
| 12th                                                              | 15       | 5.8  |      |      |              |
| Employed Father                                                   |          |      |      |      |              |
| Yes                                                               | 249      | 95.8 |      |      |              |
| No                                                                | 11       | 4.2  |      |      |              |
| Employed Mother                                                   |          |      |      |      |              |
| Yes                                                               | 236      | 90.8 |      |      |              |
| No                                                                | 24       | 9.2  |      |      |              |
| MH problem                                                        |          |      |      |      |              |
| Yes                                                               | 4        | 1.5  |      |      |              |
| No                                                                | 256      | 98.5 |      |      |              |
| Recourse to a Health Service due to<br>MH problem (last 3 months) |          |      |      |      |              |
| Yes                                                               | 6        | 2.3  |      |      |              |
| No                                                                | 254      | 97.7 |      |      |              |
| Psychologist or psychiatrist<br>monitoring                        |          |      |      |      |              |
| Yes                                                               | 181      | 69.6 |      |      |              |
| No                                                                |          |      |      |      |              |
| Contact with someone with a MH<br>problem                         |          |      |      |      |              |
| Yes                                                               | 126      | 48.5 |      |      |              |
| No                                                                | 134      | 51.5 |      |      |              |
| Hours of sleep/day                                                |          |      |      |      | 8.46 (1.19)  |
| Taking medication for MH                                          |          |      |      |      |              |
| Yes                                                               | 5        | 1.9  |      |      |              |
| No                                                                | 255      | 98.1 |      |      |              |
| Regular exercise                                                  |          |      |      |      |              |
| Yes                                                               | 190      | 73.1 |      |      |              |
| No                                                                | 70       | 26.9 |      |      |              |
| No. of meals/day                                                  |          |      |      |      | 4.33 (0.94)  |
| Daily fruit/vegetable intake                                      |          |      |      |      |              |
| Yes                                                               | 219      | 84.2 |      |      |              |
| No                                                                | 41       | 15.8 |      |      |              |
| Hours online/day                                                  |          |      |      |      | 5.60 (4.50)  |
| Hours in front of a screen/day                                    |          |      |      |      | 5.75 (3.63)  |
| Victim of violence                                                |          |      |      |      |              |
| Yes                                                               | 47       | 18.1 |      |      |              |
| No                                                                | 213      | 81.9 |      |      |              |
| Friends at school                                                 |          |      |      |      |              |
| Yes                                                               | 259      | 99.6 |      |      |              |
| No                                                                | 1        | 0.4  |      |      |              |

**Table S1.** (cont.)

|                                          | <i>n</i> | %    | Min. | Max. | Mean (SD)   |
|------------------------------------------|----------|------|------|------|-------------|
| Friends out of school                    |          |      |      |      |             |
| Yes                                      | 258      | 99.2 |      |      |             |
| No                                       | 2        | 0.8  |      |      |             |
| Consumption of alcoholic drinks          |          |      |      |      |             |
| Yes                                      | 24       | 9.2  |      |      |             |
| No                                       | 236      | 90.8 |      |      |             |
| Tobacco consumption                      |          |      |      |      |             |
| Yes                                      | 9        | 3.5  |      |      |             |
| No                                       | 251      | 96.5 |      |      |             |
| MH self-perception                       |          |      | 1    | 5    | 4.25 (0.89) |
| PH self-perception                       |          |      | 1    | 5    | 4.13 (0.82) |
| Body image self-perception               |          |      | 1    | 5    | 3.73 (0.96) |
| PH self-perception during<br>confinement |          |      | 1    | 5    | 2.95 (0.87) |
| MH self-perception during<br>confinement |          |      | 1    | 5    | 3.07 (0.67) |

Abbreviations: Max., maximum; Min., minimum; MH, mental health; *n*, number of cases; No., number; PH, physical health; %, percent; SD, standard deviation.
