# Supplementary material for: Mental Health Literacy and Positive Mental Health in Adolescents: A Correlational Study
Source: Int J Environ Res Public Health. 2022 Jul 3;19(13):8165. doi: 10.3390/ijerph19138165 (PMC9266633; doi:10.3390/ijerph19138165)
Supplement: Supplementary file 1 [file ijerph-19-08165-s001.zip › Table S2.pdf]

**Table S2.** MHKQ – descriptive statistics ( $n = 260$ ).

| Item                                                                                                                                                | n   | %    | Min. | Max. | Mean  | SD   |
|-----------------------------------------------------------------------------------------------------------------------------------------------------|-----|------|------|------|-------|------|
| <b>Knowledge about the characteristics of mental health and mental disorders</b>                                                                    |     |      |      |      |       |      |
| 1. Mental health is a component of health                                                                                                           | 260 |      | 1    | 5    | 4.80  | 0.67 |
| 2. Mental disorders are caused by incorrect thoughts                                                                                                | 260 |      | 1    | 5    | 2.57  | 1.22 |
| 3. Many people have mental problems, but they don't realize it                                                                                      | 260 |      | 1    | 5    | 4.17  | 0.93 |
| 4. All mental disorders are caused by external stressors                                                                                            | 260 |      | 1    | 5    | 3.12  | 1.16 |
| 5. Components of mental health include normal intelligence, stable mood, a positive attitude, quality interpersonal relationships, and adaptability | 260 |      | 1    | 5    | 4.15  | 1.05 |
| 6. Most mental disorders cannot be cured                                                                                                            | 260 |      | 1    | 5    | 3.24  | 1.18 |
| 7. Psychological or psychiatric services should be sought if you suspect the presence of mental problems or disorders                               | 260 |      | 1    | 5    | 4.64  | 0.77 |
| 8. Psychological problems can occur at any age                                                                                                      | 260 |      | 1    | 5    | 4.66  | 0.78 |
| 9. Mental disorders and psychological problems cannot be avoided                                                                                    | 260 |      | 1    | 5    | 3.13  | 1.32 |
| 10. In severe mental disorders (eg, schizophrenia), medications should only be taken for a certain period of time                                   | 260 |      | 1    | 5    | 3.43  | 1.14 |
| 11. Positive attitudes, good interpersonal relationships and a healthy lifestyle can help maintain mental health                                    | 260 |      | 1    | 5    | 4.68  | 0.77 |
| 12. Individuals with a family history of mental disorders are at increased risk for psychological and mental disorders                              | 260 |      | 1    | 5    | 3.70  | 1.13 |
| 13. Psychological problems in adolescents do not influence academic results                                                                         | 260 |      | 1    | 5    | 4.22  | 1.15 |
| 14. Middle-aged or elderly individuals are unlikely to develop psychological problems and mental disorders                                          | 260 |      | 1    | 5    | 3.89  | 1.24 |
| 15. Individuals with weak temperaments are more likely to have mental problems                                                                      | 260 |      | 1    | 5    | 3.39  | 1.08 |
| 16. Mental problems or disorders can occur when an individual is under psychological stress or faces a significant situation in their life          | 260 |      | 1    | 5    | 4.30  | 0.96 |
| Total Score                                                                                                                                         |     |      | 16   | 80   | 62.03 | 6.27 |
| <b>Awareness of mental health promotion activities</b>                                                                                              |     |      |      |      |       |      |
| 17. Have you ever heard about World Mental Health Day?                                                                                              |     |      |      |      |       |      |
| Yes                                                                                                                                                 | 168 | 64.6 |      |      |       |      |
| No                                                                                                                                                  | 92  | 35.4 |      |      |       |      |
| 18. Have you heard about the International Day against Drug Abuse and Illicit Drug Trafficking?                                                     |     |      |      |      |       |      |
| Yes                                                                                                                                                 | 98  | 37.7 |      |      |       |      |
| No                                                                                                                                                  | 162 | 62.3 |      |      |       |      |
| 19. Have you ever heard about the International Day for the Prevention of Suicide?                                                                  |     |      |      |      |       |      |
| Yes                                                                                                                                                 | 125 | 48.1 |      |      |       |      |
| No                                                                                                                                                  | 135 | 51.9 |      |      |       |      |
| 20. Have you ever heard about the World Sleep Day?                                                                                                  |     |      |      |      |       |      |
| Yes                                                                                                                                                 | 77  | 29.6 |      |      |       |      |
| No                                                                                                                                                  | 183 | 70.4 |      |      |       |      |

Abbreviations: Max., maximum; Min., minimum;  $n$ , number of cases; SD, standard deviation; %, percent.
