# Supplementary material for: Mental Health Literacy and Positive Mental Health in Adolescents: A Correlational Study
Source: Int J Environ Res Public Health. 2022 Jul 3;19(13):8165. doi: 10.3390/ijerph19138165 (PMC9266633; doi:10.3390/ijerph19138165)
Supplement: Supplementary file 1 [file ijerph-19-08165-s001.zip › Table S3.pdf]

**Table S3.** PMHQ – descriptive statistics ( $n = 260$ ).

| Factor/Item                                                                                                      | <i>n</i> | Min. | Max. | Mean  | SD   |
|------------------------------------------------------------------------------------------------------------------|----------|------|------|-------|------|
| <b>F1. Personal satisfaction</b>                                                                                 |          |      |      | 27.45 | 4.22 |
| 4. I like me the way I am*                                                                                       | 260      | 1    | 4    | 3.19  | 0.91 |
| 6. I feel able to explode                                                                                        | 260      | 1    | 4    | 3.22  | 0.90 |
| 7. For me life is boring and monotonous                                                                          | 260      | 1    | 4    | 3.49  | 0.74 |
| 12. I see my future with pessimism                                                                               | 260      | 1    | 4    | 3.59  | 0.78 |
| 14. I consider myself a less important person than the other people around me                                    | 260      | 1    | 4    | 3.53  | 0.74 |
| 31. I think I'm useless                                                                                          | 260      | 1    | 4    | 3.61  | 0.71 |
| 38. I feel dissatisfied with myself                                                                              | 260      | 1    | 4    | 3.43  | 0.81 |
| 39. I feel dissatisfied with my physical appearance                                                              | 260      | 1    | 4    | 3.38  | 0.80 |
| <b>F2. Pro-social attitude</b>                                                                                   |          |      |      | 17.87 | 2.21 |
| 1. It's hard for me to accept others when they have different attitudes from mine                                | 260      | 1    | 4    | 3.48  | 0.73 |
| 3. It's hard for me to listen to people's problems                                                               | 260      | 1    | 4    | 3.70  | 0.62 |
| 23. I think I'm a trustworthy person*                                                                            | 260      | 1    | 4    | 3.71  | 0.62 |
| 25. I think about the needs of others*                                                                           | 260      | 1    | 4    | 3.27  | 0.86 |
| 37. I like to help others*                                                                                       | 260      | 1    | 4    | 3.70  | 0.63 |
| <b>F3. Self-control</b>                                                                                          |          |      |      | 14.96 | 3.20 |
| 2. Problems block me easily                                                                                      | 260      | 1    | 4    | 3.18  | 0.75 |
| 5. I can control myself when I have negative emotions*                                                           | 260      | 1    | 4    | 2.77  | 0.91 |
| 21. I am able to control myself when I have negative thoughts*                                                   | 260      | 1    | 4    | 2.99  | 0.86 |
| 22. I am able to maintain good self-control in conflict situations that arise in my life*                        | 260      | 1    | 4    | 3.00  | 0.84 |
| 26. In the presence of unfavourable pressures from outside I am able to maintain my personal balance*            | 260      | 1    | 4    | 3.02  | 0.84 |
| <b>F4. Autonomy</b>                                                                                              |          |      |      | 15.69 | 3.01 |
| 10. I'm very concerned about what people think of me                                                             | 260      | 1    | 4    | 3.04  | 0.90 |
| 13. The opinions of others influence me a lot when making my decisions                                           | 260      | 1    | 4    | 3.19  | 0.80 |
| 19. I worry that people criticize me                                                                             | 260      | 1    | 4    | 3.06  | 0.92 |
| 33. I have difficulties in having personal opinions                                                              | 260      | 1    | 4    | 3.53  | 0.80 |
| 34. When I have to make important decisions, I feel very insecure                                                | 260      | 1    | 4    | 2.87  | 0.91 |
| <b>F5. Problem-solving and self-actualization</b>                                                                |          |      |      | 29.32 | 4.46 |
| 15. I am able to make the decisions for myself*                                                                  | 260      | 1    | 4    | 3.36  | 0.83 |
| 16. I try to remove the positive aspects of the "bad" things that happen to me*                                  | 260      | 1    | 4    | 2.87  | 0.98 |
| 17. I try to improve myself*                                                                                     | 260      | 1    | 4    | 3.57  | 0.77 |
| 27. When there are changes in my life, I try to adapt*                                                           | 260      | 1    | 4    | 3.42  | 0.72 |
| 28. Faced with a problem, I am able to request information*                                                      | 260      | 1    | 4    | 3.16  | 0.83 |
| 29. The changes that usually occur in my daily life stimulate me*                                                | 260      | 1    | 4    | 2.75  | 0.90 |
| 32. I try to develop and enhance my good attitudes*                                                              | 260      | 1    | 4    | 3.55  | 0.68 |
| 35. I can say no when I want to say it*                                                                          | 260      | 1    | 4    | 3.21  | 0.87 |
| 36. When I have a problem, I try to find possible solutions*                                                     | 260      | 1    | 4    | 3.45  | 0.74 |
| <b>F6. Interpersonal relationship skills</b>                                                                     |          |      |      | 22.97 | 3.58 |
| 8. It's hard for me to give emotional support                                                                    | 260      | 1    | 4    | 3.50  | 0.79 |
| 9. I have difficulties establishing satisfactory interpersonal relationships with some people                    | 260      | 1    | 4    | 3.52  | 0.69 |
| 11. I believe that I have a lot of capacity to put myself in the shoes of others and understand their responses* | 260      | 1    | 4    | 2.95  | 0.94 |
| 18. I consider myself a good advisor*                                                                            | 260      | 1    | 4    | 3.13  | 0.86 |
| 20. I consider myself a sociable person*                                                                         | 260      | 1    | 4    | 3.20  | 0.92 |
| 24. It's hard for me to understand the feelings of others                                                        | 260      | 1    | 4    | 3.43  | 0.77 |
| 30. I have difficulties in relating openly with my teachers/boss                                                 | 260      | 1    | 4    | 3.23  | 0.95 |

Abbreviations: Max., maximum; Min., minimum; *n*, number of cases; SD, standard deviation; \*, inverted items.
